# Supplementary material
Source: MDPI journal article supplement (https://www.mdpi.com/2076-3417/10/4/1274)
Supplement: s1 [file s1]

**Supplementary Material**

1. Box Girder

The measured hourly temperature curves of all temperature sensors installed on the box girder cross-sections were compared with the numerical hourly temperature curves calculated by the FEM using the Air Element Method as the simulation method for the internal thermal boundary conditions, as shown in Figure 1. The solid points denote the measured data, and the solid lines with hollow points denote the calculated curves. In Figure 1, it can be observed that the trends and the times at which the maximum temperatures occurred are similar for the measured and numerical hourly temperature curves (the maximum RMSE was 1.3 °C, and the maximum MAPE was 3.8%).

|  |  |
| --- | --- |
| (a) | (b) |
|  |  |
| (c) | (d) |
|  |  |
| (e) |  |
| **Figure 1.** Comparisons of the hourly temperature curves of the box girder cross-sections obtained by the field test and the FEM using the Air Element Method as the simulation method for the internal thermal boundary conditions: (a) Sensors in the top flange; (b) sensors in the bottom flange; (c) sensors in the left exterior web; (d) sensors in the interior webs; (e) sensors in the right exterior web. | |

2. Small Box Girder

The measured hourly temperature curves of all temperature sensors installed on the small box girder cross-sections were compared with the numerical hourly temperature curves calculated by the FEM using the Air Element Method as the simulation method for the internal thermal boundary conditions, as shown in Figure 2. The solid points denote the measured data, and the solid lines with hollow points denote the calculated curves. In Figure 2, it can be observed that the trends and the times at which the maximum temperatures occurred are similar for the measured and numerical hourly temperature curves (the maximum RMSE was 0.8 °C, and the maximum MAPE was 2.6%).

| **** | **** |
| --- | --- |
| (a) | (b) |
| **** |  |
| (c) |  |
| **Figure 2.** Comparisons of the hourly temperature curves of the small box girder cross-sections obtained by the field test and the FEM using the Air Element Method as the simulation method for the internal thermal boundary conditions: (a) Sensors in the top flanges; (b) sensors in the bottom flanges; (c) sensors in the webs. | |

3. Adjacent Box Girder

The measured hourly temperature curves of all temperature sensors installed on the adjacent box girder cross-sections were compared with the numerical hourly temperature curves calculated by the FEM using the Air Element Method as the simulation method for the internal thermal boundary conditions, as shown in Figure 3. The solid points denote the measured data, and the solid lines with hollow points denote the calculated curves. In Figure 3, it can be observed that the trends and the times at which the maximum temperatures occurred are similar for the measured and numerical hourly temperature curves (the maximum RMSE was 1.2 °C, and the maximum MAPE was 3.0%).

|  |  |
| --- | --- |
| (a) | (b) |
|  |  |
| (c) |  |
| **Figure 3.** Comparisons of the hourly temperature curves of the adjacent box girder cross-sections obtained by the field test and the FEMs using the Air Element Method as the simulation method for the internal thermal boundary conditions: (a) Sensors in the top flanges; (b) sensors in the bottom flanges; (c) sensors in the webs. | |

© 2018 by the authors. Submitted for possible open access publication under the
terms and conditions of the Creative Commons Attribution (CC BY) license (http://creativecommons.org/licenses/by/4.0/).
